# Supplementary material for: Ultrasonic-assisted synthesis of carbon nanotube supported bimetallic Pt–Ru nanoparticles for effective methanol oxidation
Source: Royal Society of Chemistry journal article supplement (doi:10.1039/c5ta00695c), 2015-01-01
Supplement: c5ta00695c1.pdf [file c5ta00695c1.pdf]

## Supplementary material

# **Ultrasonic-Assisted Synthesis of Bimetallic PtRu Nanoparticles Supported on Carbon Nanotubes for Effective Methanol Oxidation**

Yazhou Zhou,<sup>ab</sup> Guohai Yang,<sup>b</sup> Horng Bin Pan,<sup>c</sup> Chengzhou Zhu,<sup>b</sup> Shaofang Fu,<sup>b</sup> Qiurong Shi,<sup>b</sup> Dan Du,<sup>b</sup> Xiaonong Cheng,<sup>a</sup> Juan Yang,<sup>\*a</sup> Chien M. Wai,<sup>c</sup> and Yuehe Lin<sup>\*b</sup>

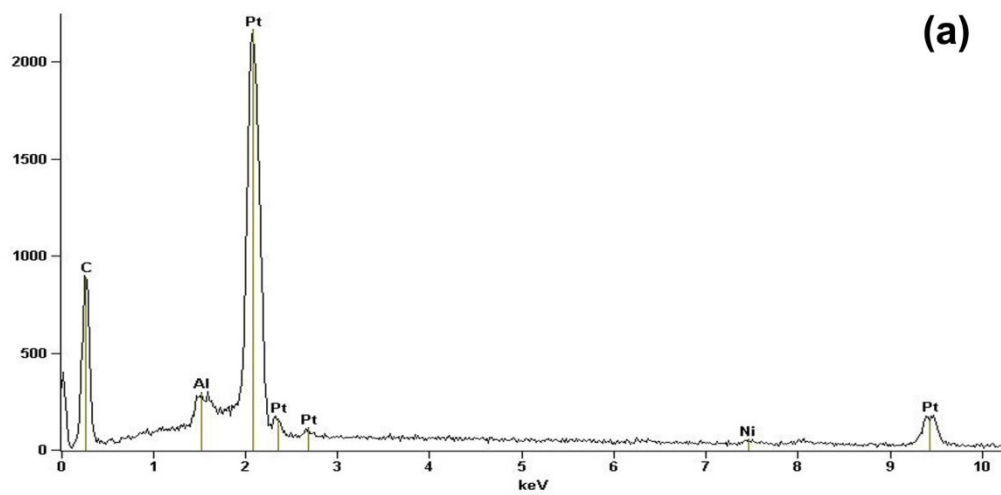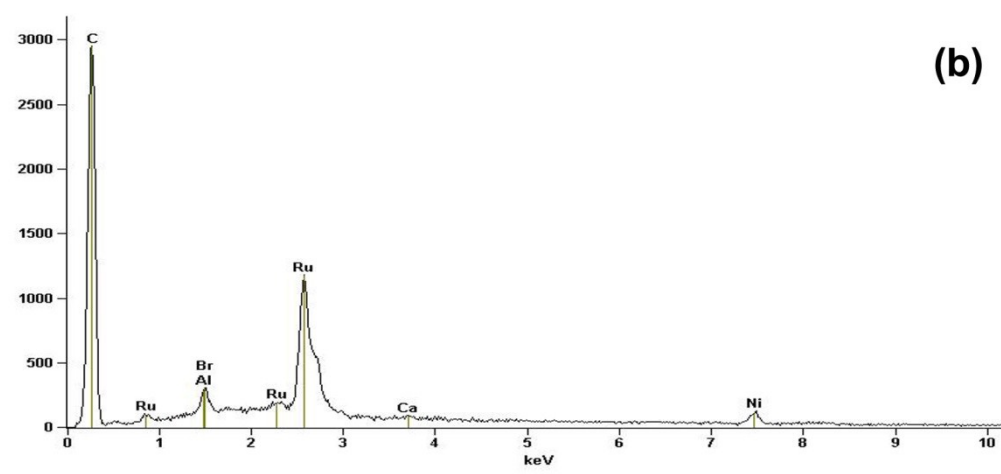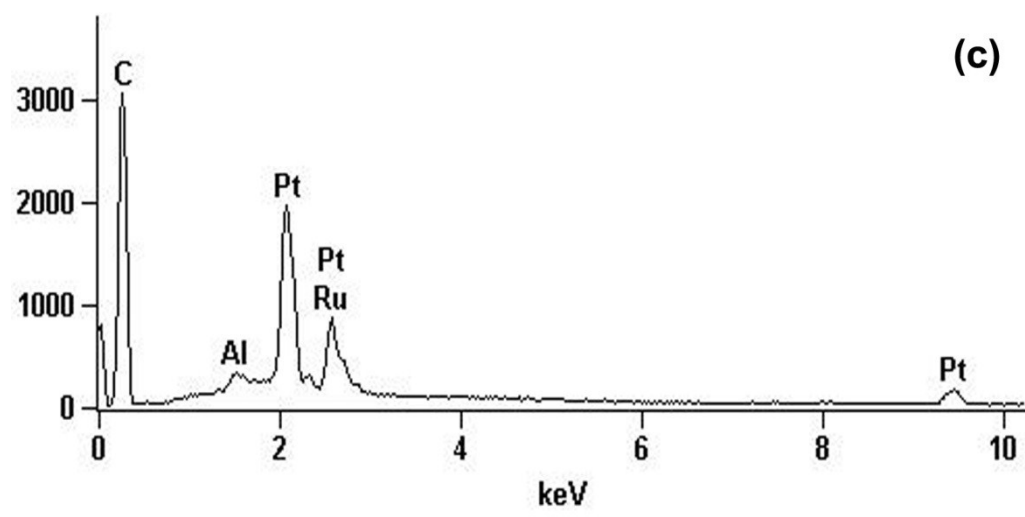

**Fig. S1. EDX spectra of Pt/c-MWNTs, Ru/c-MWNTs and PtRu/c-MWNTs.**

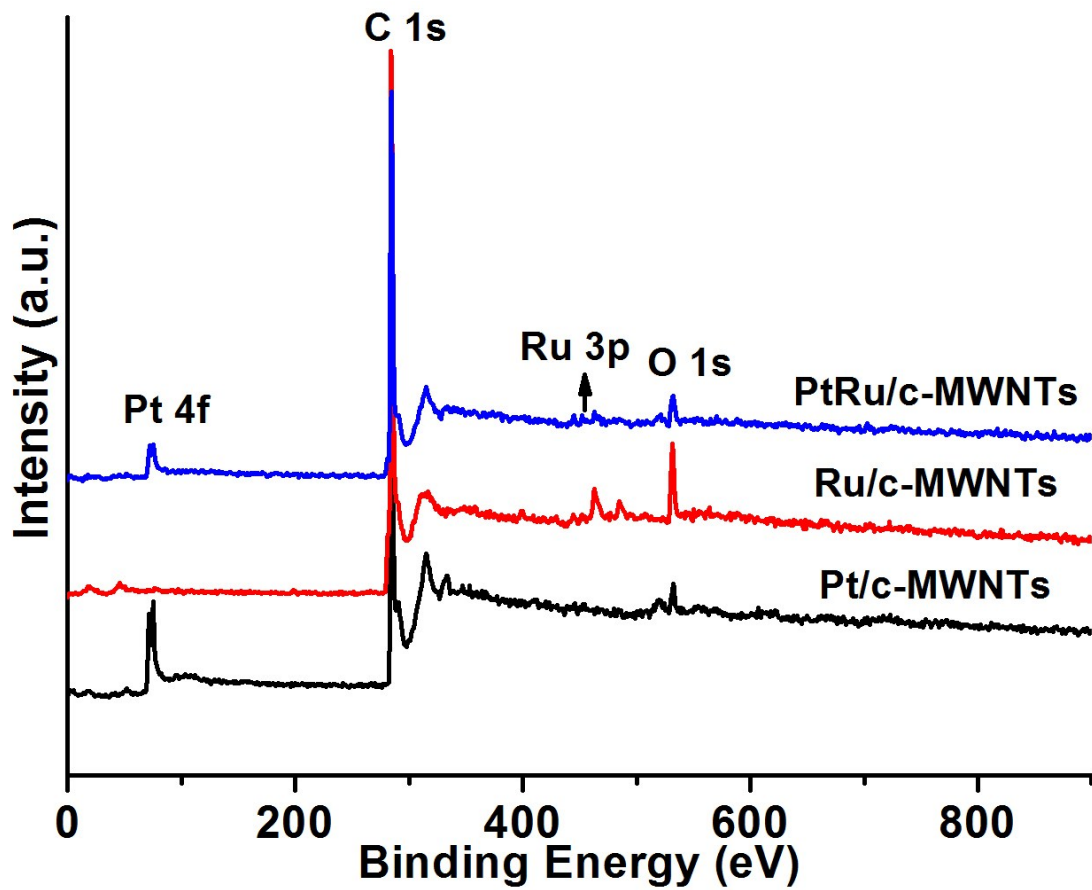

Fig. S2. XPS spectra of Pt/c-MWNTs, Ru/c-MWNTs and PtRu/c-MWNTs.

Electrochemical Characterization of PtRu/c-MWNTs catalyst.

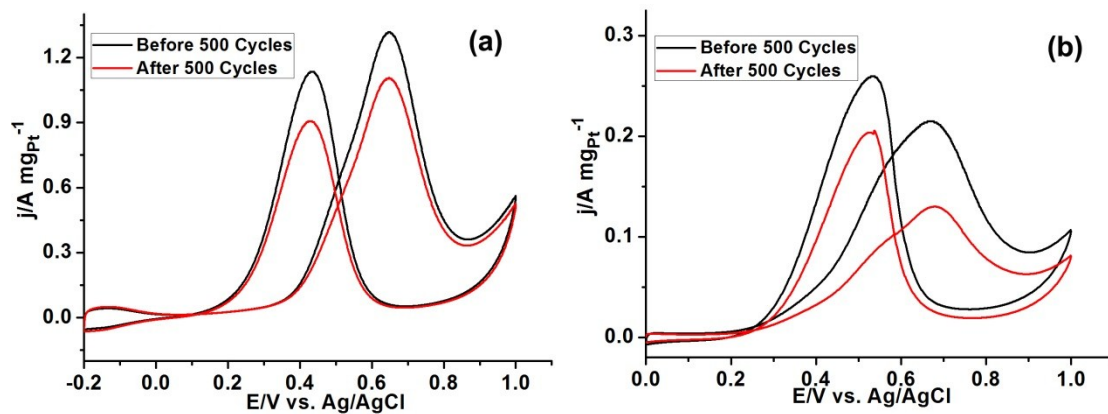

**Fig. S3. CVs and of the (a) PtRu/c-MWNTs and (b) commercial Pt/C (20 wt.%) catalysts before and after 500 cycles (vs Ag/AgCl).**
